# Supplementary material
Source: PubMed Central journal article supplement (PMC9040768)
Supplement: mbio.00240-22-sf001.pdf [file mbio.00240-22-sf001.pdf]

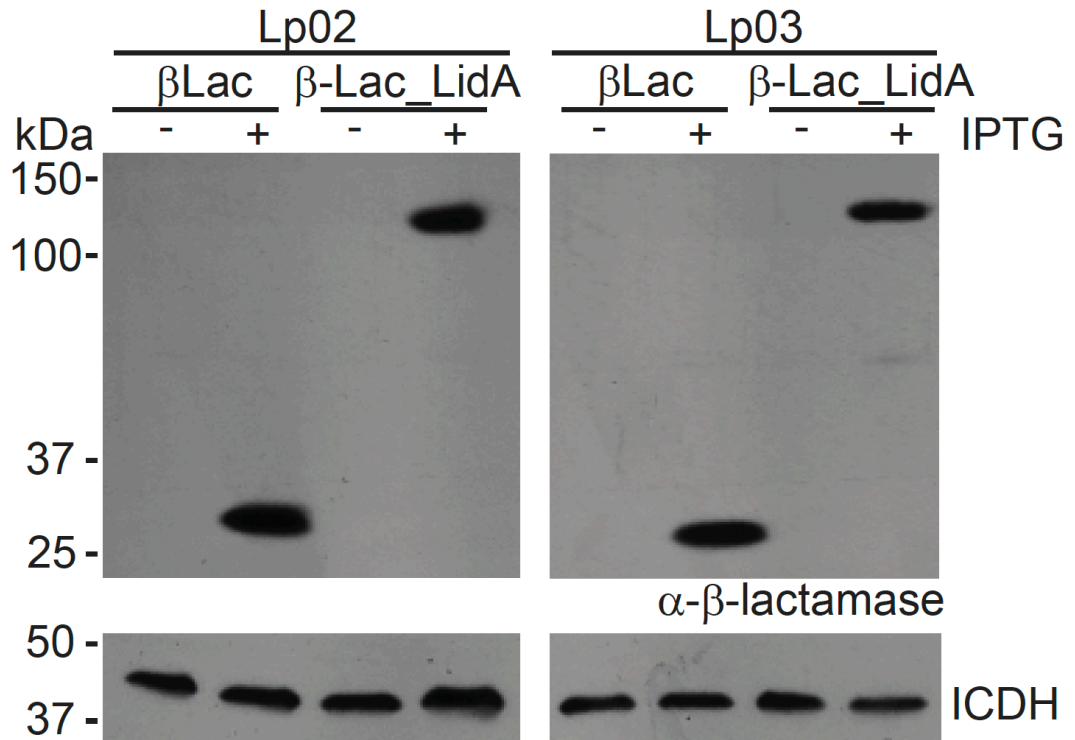

**Supplemental Figure 1:**

The production of  $\beta$ Lac or  $\beta$ Lac\_LidA was induced overnight by incubation with IPTG in both strains Lp02 and Lp03. Proteins within the bacterial lysate were separated by SDS-PAGE. After transfer to nitrocellulose membranes, the  $\beta$ Lac-tagged proteins were immunologically detected using a  $\beta$ -lactamase specific antibody (top). Isocitrate dehydrogenase (ICDH) served as a loading control (bottom).
