# Supplementary material
Source: PubMed Central journal article supplement (PMC9040768)
Supplement: mbio.00240-22-sf002.pdf [file mbio.00240-22-sf002.pdf]

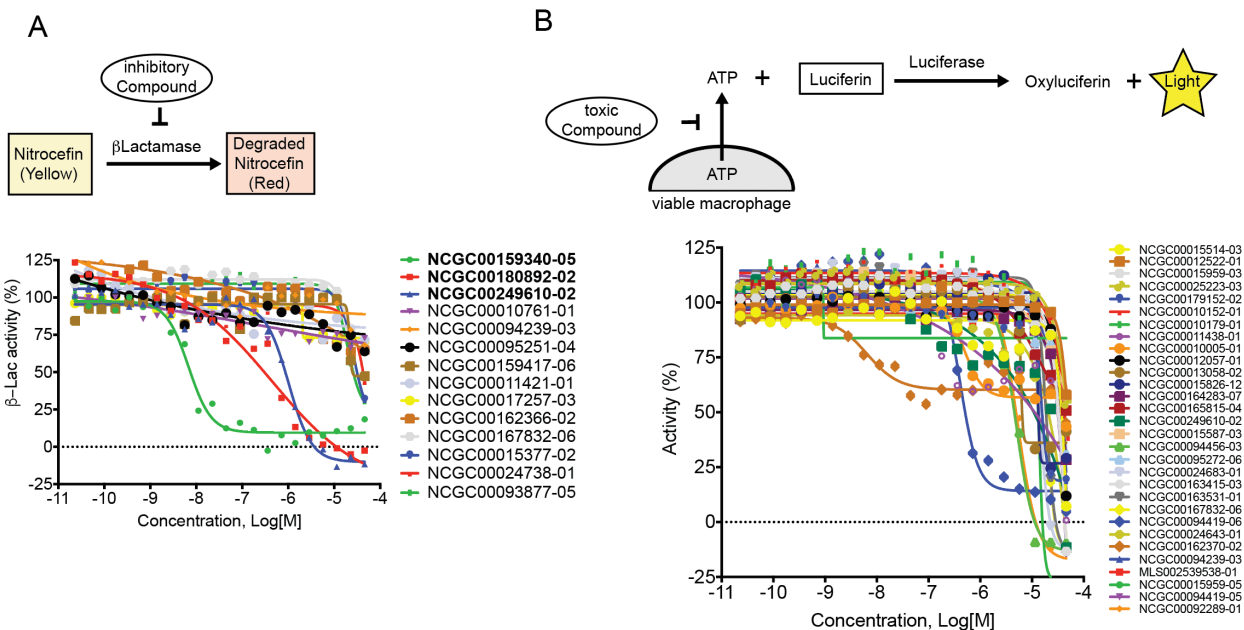

**Supplemental Figure 2:**

(A)  $\beta$ -lactamase specificity assay principle based on hydrolysis of the chromogenic substrate nitrocefim, an indicator of  $\beta$ -Lac enzymatic activity. (B) Cell cytotoxicity assay principle based on ATP abundance, an indicator of metabolically active cells.
