# Supplementary material
Source: PubMed Central journal article supplement (PMC9040768)
Supplement: mbio.00240-22-sf003.pdf [file mbio.00240-22-sf003.pdf]

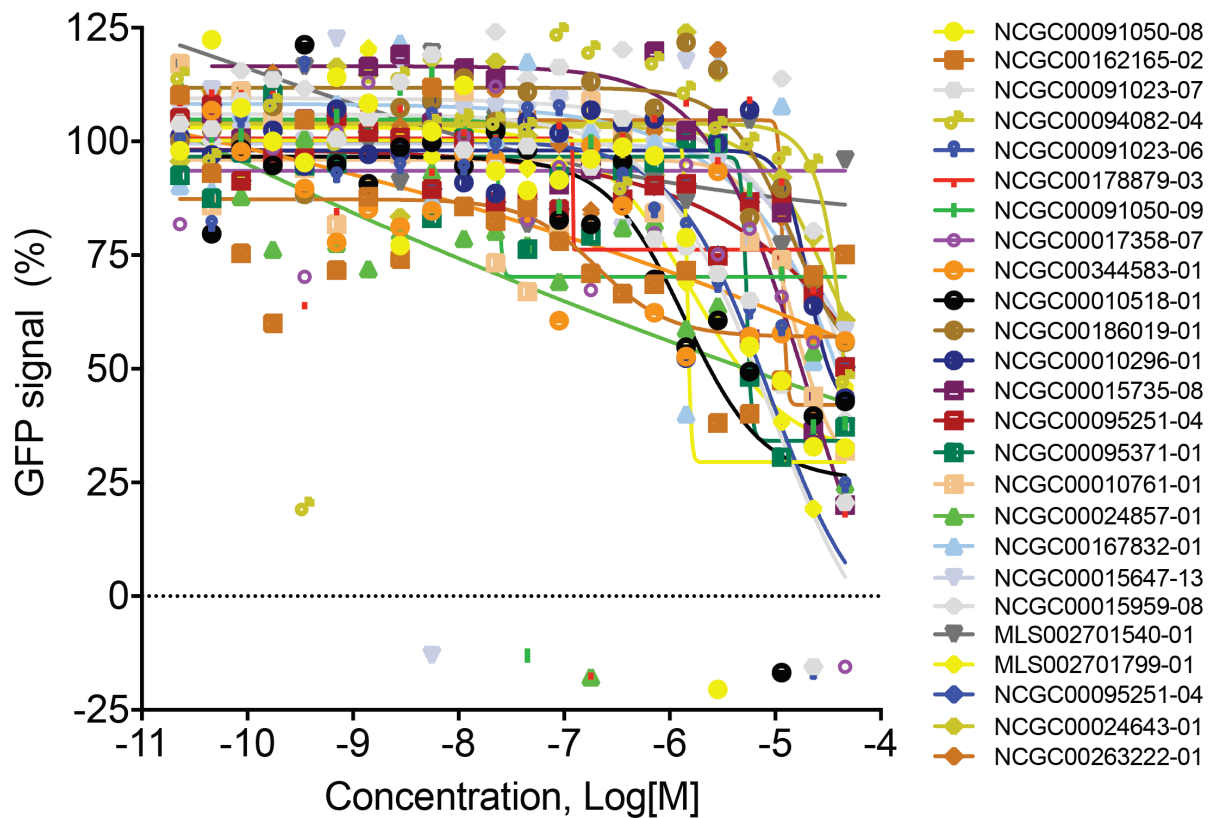

**Supplemental Figure 3:**

Legionella growth inhibition in a 1536 well plate format. RAW264.7 macrophages were challenged with a GFP-producing *L. pneumophila* for 14 hours in the presence of the indicated compounds, and the GFP signal (as a measure for bacterial growth) was determined using an IN Cell Analyzer 2200 Imaging system.
