# Supplementary material
Source: PubMed Central journal article supplement (PMC9040768)
Supplement: mbio.00240-22-sf004.pdf [file mbio.00240-22-sf004.pdf]

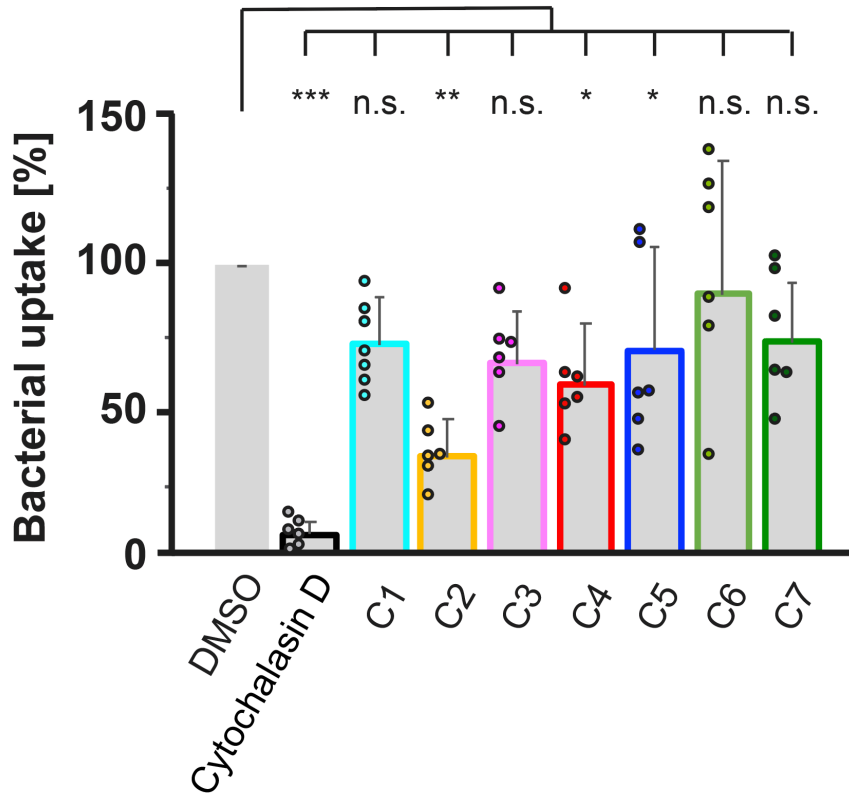

**Supplemental Figure 4:**

Bacterial uptake by macrophages in the presence of compounds. RAW264.7 macrophages were treated with the indicated compounds, Cytochalasin D, or DMSO vehicle prior to infection with Lp02, and intracellular bacteria were enumerated visually. Data shown are the mean with standard deviation from six experimental replicates, with the DMSO control considered as 100%. P-values (t-test) are <0.05 (\*), <0.001 (\*\*), or <0.005 (\*\*\*) relative to the control.
