# Supplementary material
Source: PubMed Central journal article supplement (PMC9040768)
Supplement: mbio.00240-22-sf005.pdf [file mbio.00240-22-sf005.pdf]

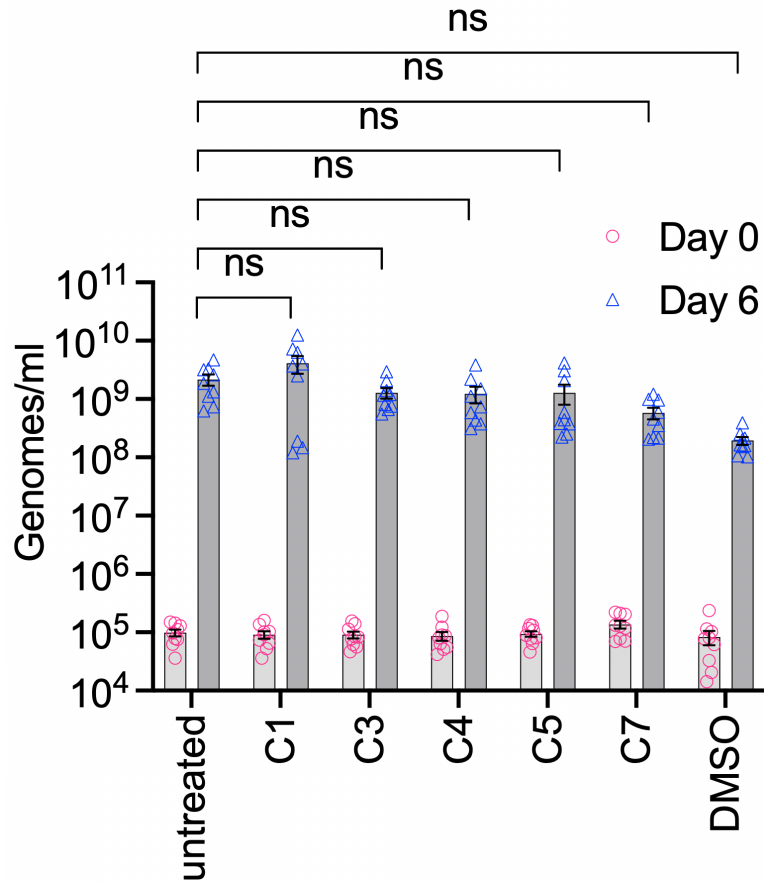

### Supplemental Figure 5:

In vitro replication of *C. burnetii* in the presence of compounds. ACCM-D broth cultures containing 5  $\mu$ M of the indicated compounds or DMSO and inoculated with  $\sim 1 \times 10^5$  per ml of *C. burnetii* were incubated at 37° C in a 2.5% O<sub>2</sub> and 5% CO<sub>2</sub>. The plot depicts the number of *C. burnetii* genomes measured in ACCM-D broth cultures at the start of the experiment (Day 0) and after incubation (Day 6) detected by qRT-PCR (1). Bars indicate the mean  $\pm$  SEM of combined data from three independent experiments each performed with triplicate samples (N = 9). One-way ANOVA analysis indicated differences between groups at D6 were found not significant (ns) using a 95% confidence interval.

1. K. M. Sandoz, D. E. Sturdevant, B. Hansen, R. A. Heinzen, Developmental transitions of *Coxiella burnetii* grown in axenic media. J Microbiol Methods 96, 104-110 (2014).
