# Supplementary material
Source: PubMed Central journal article supplement (PMC9040768)
Supplement: mbio.00240-22-st001.pdf [file mbio.00240-22-st001.pdf]

**Table S1 - Data of 113 compounds selected from the qHTS reporter translocation assay**

| Number | Sample ID     | Structure                                                                           | IC <sub>50</sub> (μM) | CC-v2 | Efficacy |
|--------|---------------|-------------------------------------------------------------------------------------|-----------------------|-------|----------|
| 1      | NCGC00161931* | 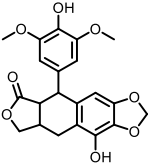   | 0.03                  | -1.4  | -34.982  |
| 2      | NCGC00094239* |    | 0.07                  | -1.4  | -30.85   |
| 3      | NCGC00163531  |    | 0.27                  | -1.2  | -50.607  |
| 4      | MLS002539538  |  | 0.35                  | -1.2  | -41.134  |
| 5      | NCGC00344583  |  | 0.44                  | -1.2  | -29.31   |
| 6      | NCGC00162370  |  | 0.44                  | -1.4  | -28.05   |

|    |              |                                                                                     |      |      |          |
|----|--------------|-------------------------------------------------------------------------------------|------|------|----------|
| 7  | NCGC00025063 | 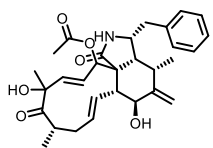   | 0.87 | -1.2 | -48.555  |
| 8  | NCGC00162366 |    | 0.87 | -1.4 | -28.66   |
| 9  | NCGC00095992 |    | 1.23 | -1.1 | -84.196  |
| 10 | NCGC00014911 |   | 1.23 | -1.2 | -56.455  |
| 11 | NCGC00015647 |  | 1.23 | -1.4 | -27.45   |
| 12 | MLS002701799 |  | 1.94 | -1.2 | -45.227  |
| 13 | NCGC00015334 |  | 3.46 | -1.1 | -105.171 |
| 14 | NCGC00025125 |  | 3.46 | -1.2 | -39.111  |

|    |               |                                                                                     |      |      |          |
|----|---------------|-------------------------------------------------------------------------------------|------|------|----------|
| 15 | NCGC00345825  | 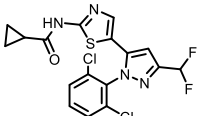   | 3.46 | -1.4 | -22.633  |
| 16 | NCGC00095145* |    | 3.88 | -1.2 | -42.504  |
| 17 | NCGC00179152  |    | 3.88 | -1.2 | -45.827  |
| 18 | NCGC00091050  |    | 4.35 | -1.1 | -104.912 |
| 19 | MLS002702908  |   | 4.35 | -1.1 | -95.171  |
| 20 | NCGC00013058  |  | 4.88 | -1.1 | -95.889  |
| 21 | NCGC00346570  |  | 4.88 | -1.1 | -139.385 |
| 22 | NCGC00015334  |  | 5.48 | -1.1 | -114.984 |

|    |               |                                                                                     |       |      |          |
|----|---------------|-------------------------------------------------------------------------------------|-------|------|----------|
| 23 | NCGC00015735  | 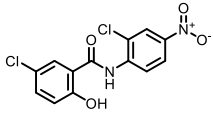   | 6.15  | -1.1 | -102.132 |
| 24 | NCGC00025212* |    | 6.90  | -1.2 | -44.612  |
| 25 | NCGC00178777* |    | 6.90  | -1.2 | -30.797  |
| 26 | NCGC00095371  |    | 8.69  | -1.2 | -62.269  |
| 27 | NCGC00015272  |  | 9.75  | -1.2 | -42.144  |
| 28 | NCGC00095272  |  | 9.75  | -1.2 | -89.173  |
| 29 | NCGC00091050  |  | 9.75  | -2.1 | -114.854 |
| 30 | NCGC00015729  |  | 9.75  | -2.2 | -49.175  |
| 31 | NCGC00015266* |  | 10.93 | -2.2 | -56.079  |

|    |              |                                                                                     |       |      |          |
|----|--------------|-------------------------------------------------------------------------------------|-------|------|----------|
| 32 | NCGC00012522 | 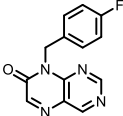   | 12.27 | -1.2 | -36.844  |
| 33 | NCGC00263102 |    | 12.27 | -1.2 | -76.16   |
| 34 | NCGC00161923 |    | 12.27 | -1.4 | -26.171  |
| 35 | NCGC00159340 |    | 12.27 | -2.1 | -112.283 |
| 36 | NCGC00249610 |   | 12.27 | -2.1 | -166.207 |
| 37 | NCGC00162165 |  | 12.27 | -2.2 | -93.685  |
| 38 | NCGC00168246 |  | 13.77 | -1.2 | -44.04   |
| 39 | NCGC00178913 |  | 13.77 | -2.2 | -93.96   |

|    |              |                                                                                     |       |      |         |
|----|--------------|-------------------------------------------------------------------------------------|-------|------|---------|
| 40 | NCGC00015959 | 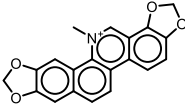   | 14.50 | -2.4 | -34.889 |
| 41 | NCGC00180892 |    | 15.45 | -2.1 | -134.5  |
| 42 | NCGC00017350 |    | 15.45 | -2.2 | -47.508 |
| 43 | NCGC00178913 |    | 15.45 | -2.2 | -42.556 |
| 44 | NCGC00016806 |   | 15.45 | -2.4 | -36.049 |
| 45 | MLS002701540 |  | 17.33 | -2.2 | -69.393 |
| 46 | NCGC00024857 |  | 17.33 | -2.2 | -59.439 |
| 47 | NCGC00015397 |  | 17.33 | -2.2 | -57.337 |
| 48 | NCGC00094748 |  | 17.33 | -2.2 | -73.809 |

|    |              |                                                                                     |       |      |          |
|----|--------------|-------------------------------------------------------------------------------------|-------|------|----------|
| 49 | NCGC00015959 | 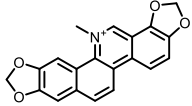   | 17.33 | -2.2 | -44.327  |
| 50 | NCGC00093877 |    | 17.33 | -2.4 | -21.89   |
| 51 | NCGC00264082 |    | 17.33 | -2.4 | -33.582  |
| 52 | NCGC00162179 |    | 17.33 | -2.4 | -30.375  |
| 53 | NCGC00010518 |   | 19.44 | -2.1 | -115.513 |
| 54 | NCGC00253592 |  | 19.44 | -2.2 | -57.81   |
| 55 | NCGC00025225 |  | 19.44 | -2.2 | -52.804  |
| 56 | NCGC00015587 |  | 19.44 | -2.2 | -65.289  |
| 57 | MLS002701797 |  | 19.44 | -2.2 | -45.242  |

|    |              |                                                                                     |       |      |         |
|----|--------------|-------------------------------------------------------------------------------------|-------|------|---------|
| 58 | NCGC00186019 | 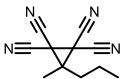   | 19.44 | -2.2 | -45.513 |
| 59 | NCGC00346822 |    | 19.44 | -2.4 | -24.604 |
| 60 | NCGC00094419 |    | 19.44 | -2.4 | -25.497 |
| 61 | NCGC00010571 |    | 19.44 | -2.4 | -29.343 |
| 62 | NCGC00015901 |   | 19.44 | -2.4 | -29.954 |
| 63 | NCGC00017358 |  | 19.44 | -2.4 | -27.468 |
| 64 | NCGC00025361 |  | 19.44 | -2.4 | -37.39  |
| 65 | NCGC00163415 |  | 19.44 | -2.4 | -31.819 |
| 66 | NCGC00178879 |  | 21.82 | -2.2 | -69.339 |
| 67 | NCGC00186015 |  | 21.82 | -2.2 | -46.7   |



|    |              |                                                                                     |       |      |         |
|----|--------------|-------------------------------------------------------------------------------------|-------|------|---------|
| 68 | NCGC00011438 | 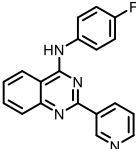   | 21.82 | -2.2 | -38.142 |
| 69 | NCGC00012765 |    | 21.82 | -2.2 | -29.776 |
| 70 | NCGC00165875 |    | 21.82 | -2.2 | -32.074 |
| 71 | NCGC00015735 |    | 21.82 | -2.2 | -84.571 |
| 72 | NCGC00015959 |  | 21.82 | -2.2 | -40.336 |
| 73 | NCGC00178879 |  | 21.82 | -2.2 | -75.008 |
| 74 | NCGC00094456 |  | 21.82 | -2.4 | -24.234 |
| 75 | NCGC00167765 |  | 21.82 | -2.4 | -27.005 |
| 76 | NCGC00185743 |  | 21.82 | -2.4 | -24.601 |

|    |              |                                                                                     |       |      |         |
|----|--------------|-------------------------------------------------------------------------------------|-------|------|---------|
| 77 | NCGC00025223 | 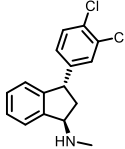   | 21.82 | -2.4 | -26.282 |
| 78 | NCGC00091250 |    | 21.82 | -2.4 | -23.257 |
| 79 | NCGC00095655 |    | 21.82 | -2.4 | -28.827 |
| 80 | MLS002701604 |    | 21.82 | -2.4 | -27.924 |
| 81 | NCGC00093787 |   | 21.82 | -2.4 | -25.29  |
| 82 | NCGC00024738 |  | 21.82 | -2.4 | -28.176 |
| 83 | NCGC00015729 |  | 21.82 | -3   | -42.26  |
| 84 | NCGC00010761 |  | 21.82 | -3   | -35.813 |
| 85 | NCGC00096028 |  | 21.82 | -3   | -29.024 |

|    |              |                                                                                     |       |      |          |
|----|--------------|-------------------------------------------------------------------------------------|-------|------|----------|
| 86 | NCGC00010152 | 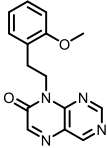   | 21.82 | -3   | -29.175  |
| 87 | NCGC00015180 |    | 24.48 | -2.4 | -29.719  |
| 88 | NCGC00011170 |    | 30.82 | -2.1 | -118.023 |
| 89 | NCGC00345082 |    | 30.82 | -2.1 | -142.324 |
| 90 | NCGC00167832 |   | 30.82 | -2.4 | -33.468  |
| 91 | NCGC00024643 |  | 30.82 | -2.4 | -37.243  |
| 92 | NCGC00012057 |  | 30.82 | -2.4 | -37.665  |
| 93 | NCGC00094082 |  | 30.82 | -2.4 | -37.989  |
| 94 | NCGC00015377 |  | 30.82 | -2.4 | -36.576  |

|     |              |                                                                                     |       |      |         |
|-----|--------------|-------------------------------------------------------------------------------------|-------|------|---------|
| 95  | NCGC00095251 | 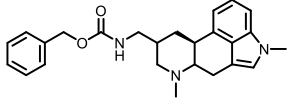   | 30.82 | -2.4 | -41.809 |
| 96  | NCGC00011421 |    | 30.82 | -2.4 | -37.139 |
| 97  | NCGC00010296 |    | 30.82 | -2.4 | -31.863 |
| 98  | NCGC00092289 |    | 30.82 | -2.4 | -33.776 |
| 99  | NCGC00012102 |   | 30.82 | -2.4 | -41.87  |
| 100 | NCGC00164283 |  | 30.82 | -3   | -41.797 |
| 101 | NCGC00165815 |  | 30.82 | -3   | -46.667 |
| 102 | NCGC00015514 |  | 30.82 | -3   | -66.235 |
| 103 | NCGC00010005 |  | 30.82 | -3   | -45.609 |
| 104 | NCGC00025223 |  | 30.82 | -3   | -71.126 |

|     |               |                                                                                     |       |      |         |
|-----|---------------|-------------------------------------------------------------------------------------|-------|------|---------|
| 105 | NCGC00015826  | 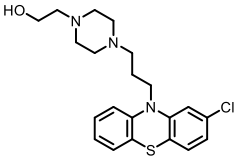   | 30.82 | -3   | -67.173 |
| 106 | NCGC00094419  |    | 30.82 | -3   | -45.649 |
| 107 | NCGC00091023  |    | 30.82 | -3   | -72.235 |
| 108 | NCGC00010179  |   | 30.82 | -3   | -65.793 |
| 109 | NCGC00015266* |  | 31.63 | -2.2 | -48.101 |
| 110 | NCGC00015983  |  | 34.58 | -3   | -38.922 |
| 111 | NCGC00263222  |  | 39.81 | -2.4 | -22.199 |
| 112 | NCGC00159417  |  | 44.67 | -2.2 | -51.811 |

113

NCGC00025216

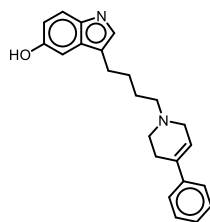

50.12

-2.1

-119.109

---

\*Asterisk indicates compounds that have isomers
