# Supplementary material
Source: PubMed Central journal article supplement (PMC9040768)
Supplement: mbio.00240-22-st002.pdf [file mbio.00240-22-st002.pdf]

**Table S2 - Data of 7 compounds selected following validation assays**

| Hit # | Sample ID    | Intracellular growth<br>IC50 $\mu$ M | Structure                                                                           | Name                                                                     |
|-------|--------------|--------------------------------------|-------------------------------------------------------------------------------------|--------------------------------------------------------------------------|
| C3    | NCGC00015397 | 1.92                                 | 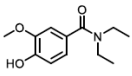   | ETHAMIVAN                                                                |
| C4    | NCGC00015826 | 19.17                                |    | PERPHENAZINE                                                             |
| C5    | NCGC00025216 | 19.67                                |    | ROXINDOLE                                                                |
| C7    | NCGC00165875 | 19.16                                |   | PAP-1                                                                    |
| C1    | NCGC00167765 | 24.13                                |  | LP-44                                                                    |
| C6    | NCGC00178913 | 7.63                                 |  | CELASTROL                                                                |
| C2    | NCGC00345082 | 9.61                                 |  | N4-ISOBUTYL-N2-[(2-PHENYL-1,3-THIAZOL-4-YL)METHYL]-2,4-PYRIMIDINEDIAMINE |
