# Supplementary material
Source: PubMed Central journal article supplement (PMC9040768)
Supplement: mbio.00240-22-st003.pdf [file mbio.00240-22-st003.pdf]

**Table S3 – Strains used in this study**

| <b>Name</b>                                  | <b>Properties</b>                                                                                                  | <b>Source</b>                                                 |
|----------------------------------------------|--------------------------------------------------------------------------------------------------------------------|---------------------------------------------------------------|
| Lp02                                         | <i>L. pneumophila Philadelphia-1</i><br><i>Sm<sup>r</sup>rpsL hsdR thyA</i>                                        | (2)                                                           |
| Lp03                                         | <i>L. pneumophila Philadelphia-1</i><br><i>Sm<sup>r</sup>rpsL hsdR thyA dotA3</i>                                  | (2)                                                           |
| Lp02_26Δ <i>dot/icm</i><br>(JV4044)          | <i>L. pneumophila Philadelphia-1</i><br><i>Sm<sup>r</sup>rpsL hsdR thyA</i> missing all 26<br><i>dot/icm</i> genes | (3)                                                           |
| <i>E. coli</i> K12 MG1655                    | <i>E. coli</i> F- <i>lambda- ilvG- rfb-50 rph-1</i>                                                                | Gift from Gisela Storz (The<br>National Institutes of Health) |
| <i>E. coli</i> K12 ER1821                    | <i>E. coli</i> F- <i>glnV44 e14-(McrA-) endA1</i><br><i>thi-1Δ(mcrC-mrr)114::IS10</i>                              | (4)                                                           |
| <i>Pseudomonas</i><br><i>aeruginosa</i> PAO1 |                                                                                                                    | Gift from Gisela Storz (The<br>National Institutes of Health) |

2. K. H. Berger, R. R. Isberg, Two distinct defects in intracellular growth complemented by a single genetic locus in *Legionella pneumophila*. *Mol Microbiol* 7, 7-19 (1993).
3. C. D. Vincent et al., Identification of non-*dot/icm* suppressors of the *Legionella pneumophila* DeltadotL lethality phenotype. *J Bacteriol* 188, 8231-8243 (2006).
4. J. A. Sexton, H. J. Yeo, J. P. Vogel, Genetic analysis of the *Legionella pneumophila* DotB ATPase reveals a role in type IV secretion system protein export. *Mol Microbiol* 57, 70-84 (2005).
