# Supplementary material
Source: PubMed Central journal article supplement (PMC9040768)
Supplement: mbio.00240-22-st004.pdf [file mbio.00240-22-st004.pdf]

**Table S4 – Plasmids used in this study**

| <b>Name</b>         | <b>Properties</b>                                             | <b>Source</b> |
|---------------------|---------------------------------------------------------------|---------------|
| pXDC61              | <i>Legionella</i> expression vector derived from pMMB207C     | (5)           |
| pXDC61_ <i>lidA</i> | <i>lidA</i> in pXDC61                                         | This study    |
| pXDC31              | <i>Legionella</i> GFP-expressing vector derived from pMMB207C | (6)           |

5. K. S. de Felipe et al., *Legionella* eukaryotic-like type IV substrates interfere with organelle trafficking. PLoS Pathog 4, e1000117 (2008).

6. X. Charpentier et al., Chemical genetics reveals bacterial and host cell functions critical for type IV effector translocation by *Legionella pneumophila*. PLoS Pathog 5, e1000501 (2009).
