# Supplementary material
Source: PubMed Central journal article supplement (PMC9040768)
Supplement: mbio.00240-22-st005.pdf [file mbio.00240-22-st005.pdf]

**Table S5 – Oligonucleotides used in this study**

| <b>Name</b>          | <b>Sequence (5' → 3', <u>underlined</u>: restriction enzyme site)</b> | <b>Purpose</b> |
|----------------------|-----------------------------------------------------------------------|----------------|
| KpnI_ <i>lidA</i> _F | GATC <u>GGTACCAT</u> GGCAAAAGATAACAAATCACATC                          | pXDC61         |
| XbaI_ <i>lidA</i> _R | GATC <u>TCTAGAT</u> TTATGATGTCTTGAATGGAGATAAAGA                       | pXDC61         |
